# TABLE OF CONTENTS

# ANESTHESIOLOGY

Volume 133  
Issue 6  
December 2020

|                                                  |     |
|--------------------------------------------------|-----|
| ◆ This Month in ANESTHESIOLOGY .....             | 1A  |
| Science, Medicine, and the Anesthesiologist..... | 13A |
| Infographics in Anesthesiology .....             | 17A |

## ◆ Editorials

### Warming Up to Cold-stored Platelets

C. S. Cohn, B. H. Shaz ..... 1161

### Preoperative Frailty and Cognitive Dysfunction Assessment: When Will We Answer the Call to Action?

D. S. Rubin, C. J. Peden ..... 1164

### Meta-analysis of Ketamine Pharmacokinetics: Lots of Work Done but Still Lots to Do

D. J. Eleveld, M. M. R. F. Struys ..... 1167

### Preventing Intraoperative Hypotension: Artificial Intelligence *versus* Augmented Intelligence?

M. Etemadi, C. W. Hogue ..... 1170

## Perioperative Medicine

### CLINICAL SCIENCE

#### ◆ A Pilot Trial of Platelets Stored Cold *versus* at Room Temperature for Complex Cardiothoracic Surgery

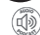

G. Strandenes, J. Sivertsen, C. K. Bjerkvig, T. K. Fosse, A. P. Cap, D. J. del Junco, E. K. Kristoffersen, R. Haaverstad, V. Kvalheim, H. Braathen, T. H. F. Lunde, T. Hervig, K. O. Hufthammer, P. C. Spinella, T. O. Apelseeth ..... 1173

No significant difference was observed between cold-stored and room temperature–stored platelets for hemostatic function assessed by chest drainage, total blood usage, platelet function, and clinical outcomes. This pilot trial supports the potential feasibility of cold-stored platelets for clinical use and provides potential guidance for future pivotal trials.

SUPPLEMENTAL DIGITAL CONTENT IS AVAILABLE IN THE TEXT

#### ◆ Brief Preoperative Screening for Frailty and Cognitive Impairment Predicts Delirium after Spine Surgery

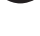

M. J. Susano, R. H. Grasfield, M. Friese, B. Rosner, G. Crosby, A. M. Bader, J. D. Kang, T. R. Smith, Y. Lu, M. W. Groff, J. H. Chi, F. Grodstein, D. J. Culley ..... 1184

Screening for frailty and cognitive impairment preoperatively using the brief FRAIL (measuring fatigue, resistance, ambulation, illness, and weight loss) scale and the Animal Verbal Fluency test in older elective spine surgery patients identifies those at high risk for the development of postoperative delirium. SUPPLEMENTAL DIGITAL CONTENT IS AVAILABLE IN THE TEXT

◆ Refers to This Month in ANESTHESIOLOGY

◆ Refers to Editorial

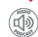

This article has an Audio Podcast

See Supplemental Digital Content

CME Article

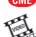

This article has a Video Abstract

Part of the Letheon writing competition

This article has a Visual Abstract

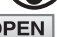

This article is Open Access

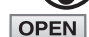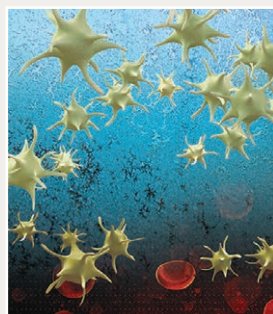

**ON THE COVER:** Platelets for transfusion are stored at room temperature (20° to 24°C), posing risk of bacterial growth and limiting shelf life. In this issue of ANESTHESIOLOGY, Strandenes *et al.* present the results of a pilot trial aimed to provide preliminary data evaluating the hemostatic potential of cold-stored platelets (2° to 6°C) compared to standard room temperature–stored in adult patients undergoing complex cardiothoracic surgery. In an accompanying Editorial, Cohn and Shaz discuss the studies that led to the current practice of storing platelets for transfusion at room temperature and previous studies of cold-stored platelets to put the new study in perspective. Cover Illustration: A. Johnson, Vivo Visuals.

- Strandenes *et al.*: A Pilot Trial of Platelets Stored Cold *versus* at Room Temperature for Complex Cardiothoracic Surgery, p. 1173
- Cohn and Shaz: Warming Up to Cold-stored Platelets, p. 1161

## ◆◆ Ketamine Pharmacokinetics: A Systematic Review of the Literature, Meta-analysis, and Population Analysis

J. Kamp, E. Olofsen, T. K. Henthorn, M. van Velzen, M. Niesters, A. Dahan, for the Ketamine Pharmacokinetic Study Group .....1192

A meta-analysis was successfully performed on 18 studies that had conducted mixed-effect pharmacokinetic analyses despite large heterogeneity in study characteristics. A populations pharmacokinetic analysis was performed on raw data sets obtained from 14 unique sources. Parameter estimates in the population pharmacokinetic analysis were comparable with those obtained in the meta-analysis of three-compartment pharmacokinetic models.

## ◆◆ Hypotension Prediction Index for Prevention of Hypotension during Moderate- to High-risk Noncardiac Surgery: A Pilot Randomized Trial

K. Maheshwari, T. Shimada, D. Yang, S. Khanna, J. B. Cywinski, S. A. Irefin, S. Ayad, A. Turan, K. Ruetzler, Y. Qiu, P. Saha, E. J. Mascha, D. I. Sessler .....1214

Of 214 noncardiac surgical patients, 105 (49%) patients randomized to management with a hypotension prediction algorithm, intraoperative hypotension was not reduced compared with controls. A lower alert threshold enabling adequate warning time and a simpler treatment algorithm that emphasizes prompt treatment after alert may help.

SUPPLEMENTAL DIGITAL CONTENT IS AVAILABLE IN THE TEXT

## ◆◆ A Pharmacokinetic and Pharmacodynamic Study of Oral Dexmedetomidine

S. Chamadia, J. C. Pedemonte, L. E. Hobbs, H. Deng, S. Nguyen, L. I. Cortinez, O. Akeju .....1223

The hypotheses that oral dexmedetomidine would be associated with hemodynamic stability and plasma concentrations consistent with rousable sedation were tested in a phase I dose-escalation study in 15 normal volunteers. Oral dexmedetomidine bioavailability was low (7.2% [95% CI, 4.7 to 14%]). Oral dexmedetomidine (300 µg, 500 µg, and 700 µg) was associated with plasma concentration-dependent decreases in mean arterial pressure and heart rate. Only the 700-µg oral dose produced plasma concentrations associated with sedation. SUPPLEMENTAL DIGITAL CONTENT IS AVAILABLE IN THE TEXT

## ◆ Oral Dexmedetomidine Promotes Non-rapid Eye Movement Stage 2 Sleep in Humans

S. Chamadia, L. Hobbs, S. Marota, R. Ibala, E. Hahm, J. Gitlin, J. Mekonnen, B. Ethridge, K. M. Colon, K. S. Sheppard, D. S. Manoach, A. DiBiasio, S. Nguyen, J. C. Pedemonte, O. Akeju .....1234

The hypothesis that oral dexmedetomidine would promote non-rapid eye movement stage 2 sleep was tested in a single-center, randomized, double-blind, crossover trial in 15 healthy volunteers. Oral dexmedetomidine increased the duration of non-rapid eye movement stage 2 sleep by 63 (95% CI, 19 to 107) min. Oral dexmedetomidine may possibly impair sleep-dependent motor memory consolidation.

## Pain Medicine

### BASIC SCIENCE

## ◆ Acid-sensing Ion Channel 3 Overexpression in Incisions Regulated by Nerve Growth Factor Participates in Postoperative Nociception in Rats

H. Li, H. Li, J. Cheng, X. Liu, Z. Zhang, C. Wu .....1244

Using a rat model of surgical incision, it was shown that both male and female animals demonstrated less wound area sensitization when acid-sensing ion channel 3 channels were pharmacologically blocked or knocked down using small interfering RNA. Anti-nerve growth factor treatment blocked the upregulation of acid-sensing ion channel 3 expression after incision and reduced the pain-related behaviors.

## Education

### IMAGES IN ANESTHESIOLOGY

## ◆ Ultrasound-guided Visualization of Subglottic Secretions in Intubated Patients

K. Tao, C. Zhu, Z. Lu .....1260

SUPPLEMENTAL DIGITAL CONTENT IS AVAILABLE IN THE TEXT

## Severe Intraoperative Hemorrhage during Craniectomy in a Patient with Polyostotic Fibrous Dysplasia

A. E. Oesterling, B. E. Hansen .....1261

### CLINICAL FOCUS REVIEW

## ◆ Platelet Function Testing in Patients on Antiplatelet Therapy before Cardiac Surgery

E. Mahla, U. S. Tantry, M. Schoerghuber, P. A. Gurbel .....1263

Based on variable pharmacodynamic responsiveness and platelet reactivity recovery after discontinuation of P2Y<sub>12</sub> receptor inhibitors, preoperative platelet function testing may individualize discontinuation and be a part of transfusion algorithm triggering targeted postpump hemostatic management.

## Genomic Screening for Malignant Hyperthermia Susceptibility

L. G. Biesecker, R. T. Dirksen, T. Girard, P. M. Hopkins, S. Riaz, H. Rosenberg, K. Stowell, J. Weber .....1277

It is timely to consider the utility and practicability of screening for malignant hyperthermia susceptibility using genomic testing. Here the authors pose a simple, but bold question: what would it take to end deaths from malignant hyperthermia? The authors review recent advances and propose a scientific and clinical pathway toward this audacious goal to provoke discussion in the field.

## REVIEW ARTICLE

- ◇ **Perioperative Management of Aneurysmal Subarachnoid Hemorrhage: A Narrative Review**  
*D. Sharma* .....1283

Aneurysmal subarachnoid hemorrhage has multisystem manifestations. Perioperative priorities include physiologic optimization, facilitating timely definitive treatment and careful selection of an anesthetic technique based on patient characteristics and the planned intervention.

## MIND TO MIND

-  **Intensive Care Psychosis**  
*B. Yates* .....1306

- Necessary Heroes and Ethos, from Fighting Nazis to COVID-19**  
*M. Berger, K. Ghadimi* .....1307

## Correspondence

- Uncertainty and Certainty: Comment**  
*E. G. Pivalizza* .....1311

- Uncertainty and Certainty: Reply**  
*E. D. Kharasch* .....1311

- Pulmonary Outcomes and Sugammadex *versus* Neostigmine: Comment**  
*G. Li, J. P. Wanderer, R. E. Freundlich* .....1312

- Pulmonary Outcomes and Sugammadex *versus* Neostigmine: Reply**  
*S. Kheterpal, M. T. Vaughn* .....1312

## Erratum ..... 1314

### Anesthesiology Reflections from the Wood Library-Museum

- Laughing Gas Kings of Penguin Guano ... or Is It GUA<sub>2</sub>O?**  
*Melissa L. Coleman and George S. Bause* .....1183

- Jolly Holly Greetings from Pittsburgh: Advertising Analgesia Formulated by King William III's Physician**  
*Jane S. Moon and George S. Bause* .....1191

- McKenna's Local Anesthetic Branded Maxine—Utilitarian or Uxorial?**  
*Melissa L. Coleman and George S. Bause* .....1233

## Careers & Events ..... 19A

## INSTRUCTIONS FOR AUTHORS

The most recently updated version of the Instructions for Authors is available at [www.anesthesiology.org](http://www.anesthesiology.org). Please refer to the Instructions for the preparation of any material for submission to ANESTHESIOLOGY.

Manuscripts submitted for consideration for publication must be submitted in electronic format via Editorial Manager (<https://www.editorialmanager.com/aln>). Detailed directions for submission and the most recent version of the Instructions for Authors can be found on the Journal's Web site (<http://www.anesthesiology.org>). Books and educational materials for review should be sent to Alan Jay Schwartz, M.D., M.S.Ed., Director of Education, Department of Anesthesiology and Critical Care Medicine, The Children's Hospital of Philadelphia,

34th Street and Civic Center Blvd., Room 9327, Philadelphia, Pennsylvania 19104-4399. Article-specific permission requests are managed with Copyright Clearance Center's Rightslink service. Information can be accessed directly from articles on the journal Web site. More information is available at <http://anesthesiology.pubs.asahq.org/public/rightsandpermissions.aspx>. For questions about the Rightslink service, e-mail [customer-care@copyright.com](mailto:customer-care@copyright.com) or call 877-622-5543 (U.S. only) or 978-777-9929. Advertising and related correspondence should be addressed to Advertising Manager, ANESTHESIOLOGY, Wolters Kluwer Health, Inc., Two Commerce Square, 2001 Market Street, Philadelphia, Pennsylvania 19103 (Web site: <http://www.wkcenter.com>). Publication of an advertisement in ANESTHESIOLOGY does not constitute endorsement by the Society or Wolters Kluwer Health, Inc. of the product or service described therein or of any representations made by the advertiser with respect to the product or service.

**ANESTHESIOLOGY** (ISSN 0003-3022) is published monthly by Wolters Kluwer Health, Inc., 14700 Citicorp Drive, Bldg 3, Hagerstown, MD 21742. Business office: Two Commerce Square, 2001 Market Street, Philadelphia, PA 19103. Periodicals postage paid at Hagerstown, MD, and at additional mailing offices. Copyright © 2020, the American Society of Anesthesiologists, Inc. All Rights Reserved.

**Annual Subscription Rates:** *United States*—\$1026 Individual, \$2451 Institution, \$413 In-training. *Rest of World*—\$1082 Individual, \$2721 Institution, \$413 In-training. Single copy rate \$245. Subscriptions outside of North America must add \$57 for airfreight delivery. Add state sales tax, where applicable. The GST tax of 7% must be added to all orders shipped to Canada (Wolters Kluwer Health, Inc.'s GST Identification #895524239, Publications Mail Agreement #1119672). Indicate in-training status and name of institution. Institution rates apply to libraries, hospitals, corporations, and partnerships of three or more individuals. Subscription prices outside the United States must be prepaid. Prices subject to change without notice. Subscriptions will begin with currently available issue unless otherwise requested. Visit us online at [www.lww.com](http://www.lww.com).

Individual and in-training subscription rates include print and access to the online version. Online-only subscriptions for individuals (\$339) and persons in training (\$339) are available to nonmembers and may be ordered by downloading a copy of the Online Subscription FAXback Form from the Web site, completing the information requested, and faxing the completed form to 301-223-2400. Institutional rates are for print only; online subscriptions are available via Ovid. Institutions can choose to purchase a print and online subscription together for a discounted rate. Institutions that wish to purchase a print subscription, please contact Wolters Kluwer Health, Inc., 14700 Citicorp Drive, Bldg 3, Hagerstown, MD 21742; phone: 800-638-3030; fax: 301-223-2400. Institutions

that wish to purchase an online subscription or online with print, please contact the Ovid Regional Sales Office near you or visit [www.ovid.com/site/index.jsp](http://www.ovid.com/site/index.jsp) and select Contact and Locations.

**Address for non-member subscription information, orders, or change of address** (except Japan): Wolters Kluwer Health, Inc., 14700 Citicorp Drive, Bldg 3, Hagerstown, MD 21742; phone: 800-638-3030; fax: 301-223-2400. In Japan, contact Wolters Kluwer Health Japan Co., Ltd., Forecast Mita Building 5th floor, 1-3-31 Mita Minato-ku, Tokyo, Japan 108-0073; phone: +81 3 5427 1969.

**Address for member subscription information, orders, or change of address:** Members of the American Society of Anesthesiologists receive the print and online journal with their membership. To become a member or provide a change of address, please contact the American Society of Anesthesiologists, 1061 American Lane, Schaumburg, Illinois 60173-4973; phone: 847-825-5586; fax: 847-825-1692; e-mail: [membership@ASAHQ.org](mailto:membership@ASAHQ.org). For all other membership inquiries, contact Wolters Kluwer Health, Inc., Customer Service Department, P.O. Box 1610, Hagerstown, MD 21740; phone: 800-638-3030; fax: 301-223-2400.

**Postmaster:** Send address changes to ANESTHESIOLOGY, P.O. BOX 1610, Hagerstown, MD 21740.

**Advertising:** Please contact Hilary Druker, National Account Manager, Health Learning, Research & Practice, Medical Journals, Wolters Kluwer Health, Inc.; phone: 609-304-9187; e-mail: [Hilary.Druker@wolterskluwer.com](mailto:Hilary.Druker@wolterskluwer.com). For classified advertising: Dave Wiegand, Recruitment Advertising Representative, Wolters Kluwer Health, Inc.; phone: 847-361-6128; e-mail: [Dave.Wiegand@wolterskluwer.com](mailto:Dave.Wiegand@wolterskluwer.com).
